# Supplementary material for: Potential impacts from simulated vessel noise and sonar on commercially important invertebrates
Source: PeerJ. 2022 Jan 26;10:e12841. doi: 10.7717/peerj.12841 (PMC8800386; doi:10.7717/peerj.12841)
Supplement: Supplemental Information 2 — Each data point refers to the amount of glucose in the hemolymph of individual lobsters and crabs, by hour after exposure, by exposure, and by species. [file peerj-10-12841-s002.xlsx]

## Sheet: Crustacean Sound Glucose
Animal ID #	Species	Time after Treatment	Treatment	Actual Glucose amount (uM)
559	Homarus americanus	0H	Mid-Freq	163.286
559	Homarus americanus	24H	Mid-Freq	137.833
559	Homarus americanus	72H	Mid-Freq	83.1515
559	Homarus americanus	7D	Mid-Freq	425.364
560	Homarus americanus	0H	Control	78.6429
560	Homarus americanus	24H	Control	112
560	Homarus americanus	24H	Mid-Freq	79.5
560	Homarus americanus	72H	Control	49.3846
560	Homarus americanus	7D	Control	56
560	Homarus americanus	7D	Mid-Freq	96.7273
561	Homarus americanus	0H	Control	63.6429
561	Homarus americanus	24H	Control	62.8333
561	Homarus americanus	72H	Control	29.7692
561	Homarus americanus	7D	Control	34.75
563	Homarus americanus	0H	Control	62.5714
563	Homarus americanus	24H	Control	55.75
563	Homarus americanus	72H	Control	49.7692
563	Homarus americanus	7D	Control	56.4167
564	Homarus americanus	0H	Merchant Vessel	8.64286
564	Homarus americanus	24H	Merchant Vessel	205.333
564	Homarus americanus	72H	Merchant Vessel	47.8485
564	Homarus americanus	7D	Merchant Vessel	101.417
565	Homarus americanus	0H	Merchant Vessel	142.214
565	Homarus americanus	24H	Merchant Vessel	44
565	Homarus americanus	72H	Merchant Vessel	34.6667
565	Homarus americanus	7D	Merchant Vessel	70.8182
567	Homarus americanus	0H	Control	63.2857
567	Homarus americanus	24H	Control	67.4167
567	Homarus americanus	72H	Control	52.8462
567	Homarus americanus	7D	Control	59.75
568	Homarus americanus	0H	Mid-Freq	109.714
568	Homarus americanus	72H	Mid-Freq	53
569	Homarus americanus	0H	Merchant Vessel	72.9286
569	Homarus americanus	24H	Merchant Vessel	72
569	Homarus americanus	72H	Merchant Vessel	51.9286
569	Homarus americanus	7D	Merchant Vessel	123.917
571	Homarus americanus	0H	Mid-Freq	353.643
571	Homarus americanus	24H	Mid-Freq	73.6667
571	Homarus americanus	72H	Mid-Freq	61.6364
571	Homarus americanus	7D	Mid-Freq	196.727
574	Homarus americanus	0H	Merchant Vessel	162.214
574	Homarus americanus	24H	Merchant Vessel	124.083
574	Homarus americanus	72H	Merchant Vessel	16.6364
574	Homarus americanus	7D	Merchant Vessel	58.0909
575	Homarus americanus	0H	Merchant Vessel	65.7857
575	Homarus americanus	24H	Merchant Vessel	137.833
575	Homarus americanus	72H	Merchant Vessel	33.303
575	Homarus americanus	7D	Merchant Vessel	66.4167
576	Homarus americanus	0H	Mid-Freq	77.2143
576	Homarus americanus	24H	Mid-Freq	56.5833
576	Homarus americanus	72H	Mid-Freq	43.9091
576	Homarus americanus	7D	Mid-Freq	95.3636
578	Homarus americanus	0H	Mid-Freq	155.786
578	Homarus americanus	24H	Mid-Freq	111.167
578	Homarus americanus	72H	Mid-Freq	43.303
578	Homarus americanus	7D	Mid-Freq	142.182
579	Homarus americanus	0H	Mid-Freq	60.4286
579	Homarus americanus	24H	Mid-Freq	44.5
579	Homarus americanus	72H	Merchant Vessel	57.697
579	Homarus americanus	7D	Mid-Freq	314
580	Homarus americanus	0H	Control	331.5
580	Homarus americanus	24H	Control	62.4167
580	Homarus americanus	72H	Control	46.3077
580	Homarus americanus	7D	Control	52.6667
581	Homarus americanus	0H	Merchant Vessel	105.429
581	Homarus americanus	24H	Merchant Vessel	313.25
581	Homarus americanus	72H	Merchant Vessel	63.4545
581	Homarus americanus	7D	Merchant Vessel	154.909
582	Homarus americanus	0H	Mid-Freq	96.1429
582	Homarus americanus	24H	Mid-Freq	87.8333
582	Homarus americanus	72H	Mid-Freq	203.455
582	Homarus americanus	7D	Mid-Freq	287.636
583	Homarus americanus	0H	Mid-Freq	172.571
583	Homarus americanus	24H	Mid-Freq	97
583	Homarus americanus	72H	Mid-Freq	78.6061
583	Homarus americanus	7D	Mid-Freq	180.364
584	Homarus americanus	0H	Merchant Vessel	58.6429
584	Homarus americanus	24H	Merchant Vessel	301.583
584	Homarus americanus	72H	Merchant Vessel	46.9394
584	Homarus americanus	7D	Merchant Vessel	91
585	Homarus americanus	0H	Control	86.5
585	Homarus americanus	24H	Control	45.3333
585	Homarus americanus	72H	Control	52.4615
585	Homarus americanus	7D	Control	59.3333
586	Homarus americanus	0H	Control	114
586	Homarus americanus	24H	Control	51.1667
586	Homarus americanus	72H	Control	62.8462
586	Homarus americanus	7D	Control	70.5833
587	Homarus americanus	24H	Control	98.6667
587	Homarus americanus	72H	Control	21.3077
587	Homarus americanus	7D	Control	25.5833
588	Homarus americanus	0H	Control	80.7857
588	Homarus americanus	24H	Control	147
588	Homarus americanus	72H	Control	31.3077
588	Homarus americanus	7D	Control	36.4167
589	Homarus americanus	0H	Merchant Vessel	55.4286
589	Homarus americanus	24H	Merchant Vessel	187
589	Homarus americanus	72H	Merchant Vessel	90.5
589	Homarus americanus	7D	Merchant Vessel	69.75
590	Homarus americanus	0H	Mid-Freq	206.857
590	Homarus americanus	24H	Mid-Freq	168.667
590	Homarus americanus	72H	Mid-Freq	71.7879
590	Homarus americanus	7D	Mid-Freq	311.727
592	Homarus americanus	0H	Merchant Vessel	129.357
592	Homarus americanus	24H	Merchant Vessel	262
592	Homarus americanus	72H	Merchant Vessel	37.6429
592	Homarus americanus	7D	Merchant Vessel	46.8333
593	Homarus americanus	0H	Mid-Freq	53.9167
593	Homarus americanus	24H	Mid-Freq	221.583
593	Homarus americanus	72H	Mid-Freq	92.5455
593	Homarus americanus	7D	Mid-Freq	275.818
594	Homarus americanus	0H	Mid-Freq	192.667
594	Homarus americanus	24H	Mid-Freq	139.5
594	Homarus americanus	72H	Mid-Freq	28
594	Homarus americanus	7D	Mid-Freq	116.273
595	Homarus americanus	0H	Merchant Vessel	144.357
595	Homarus americanus	24H	Merchant Vessel	104.909
595	Homarus americanus	72H	Merchant Vessel	63.4545
595	Homarus americanus	7D	Merchant Vessel	196.727
596	Homarus americanus	0H	Control	130.071
596	Homarus americanus	24H	Control	228.25
596	Homarus americanus	72H	Control	51.6923
596	Homarus americanus	7D	Control	58.5
597	Homarus americanus	0H	Control	66.1429
597	Homarus americanus	24H	Control	122
597	Homarus americanus	72H	Control	109
597	Homarus americanus	7D	Control	120.583
598	Homarus americanus	0H	Merchant Vessel	47.9286
598	Homarus americanus	24H	Merchant Vessel	115.333
598	Homarus americanus	72H	Merchant Vessel	73.6061
598	Homarus americanus	7D	Merchant Vessel	32.6667
599	Homarus americanus	0H	Merchant Vessel	116
599	Homarus americanus	24H	Merchant Vessel	132.846
599	Homarus americanus	72H	Merchant Vessel	30.2727
599	Homarus americanus	7D	Merchant Vessel	252.182
600	Homarus americanus	0H	Mid-Freq	132.667
600	Homarus americanus	24H	Mid-Freq	342.833
600	Homarus americanus	72H	Mid-Freq	65.2727
600	Homarus americanus	7D	Mid-Freq	166.727
602	Homarus americanus	0H	Control	152.214
602	Homarus americanus	24H	Control	139.083
602	Homarus americanus	72H	Control	25.4242
602	Homarus americanus	7D	Control	91.8333
603	Homarus americanus	0H	Control	277.214
603	Homarus americanus	24H	Control	347.833
603	Homarus americanus	72H	Control	58.1515
603	Homarus americanus	7D	Control	60.1667
604	Homarus americanus	0H	Control	176.143
604	Homarus americanus	24H	Control	98.25
604	Homarus americanus	72H	Control	70.1429
604	Homarus americanus	7D	Control	113.5
605	Homarus americanus	0H	Control	159.357
605	Homarus americanus	24H	Control	174.5
605	Homarus americanus	72H	Control	115.5
605	Homarus americanus	7D	Control	77.6667
501	Callinectes sapidus	0H	Control	134.071
501	Callinectes sapidus	24H	Control	11.6923
502	Callinectes sapidus	0H	Mid-Freq	218
502	Callinectes sapidus	24H	Mid-Freq	82.4615
502	Callinectes sapidus	72H	Mid-Freq	16.4167
502	Callinectes sapidus	7D	Mid-Freq	255.818
503	Callinectes sapidus	0H	Mid-Freq	80.7857
503	Callinectes sapidus	24H	Mid-Freq	53.2308
503	Callinectes sapidus	72H	Mid-Freq	89.75
503	Callinectes sapidus	7D	Mid-Freq	350.583
504	Callinectes sapidus	0H	Mid-Freq	191.929
504	Callinectes sapidus	24H	Mid-Freq	102.462
504	Callinectes sapidus	72H	Mid-Freq	50.1667
504	Callinectes sapidus	7D	Mid-Freq	53.5
505	Callinectes sapidus	0H	Mid-Freq	64.7143
505	Callinectes sapidus	24H	Mid-Freq	69.3846
505	Callinectes sapidus	72H	Mid-Freq	54.75
505	Callinectes sapidus	7D	Mid-Freq	93.5
506	Callinectes sapidus	0H	Control	64.7857
506	Callinectes sapidus	24H	Control	48.2308
507	Callinectes sapidus	0H	Merchant Vessel	213.714
507	Callinectes sapidus	24H	Merchant Vessel	308.545
507	Callinectes sapidus	72H	Merchant Vessel	42.0909
507	Callinectes sapidus	7D	Merchant Vessel	110.818
508	Callinectes sapidus	0H	Mid-Freq	126.5
508	Callinectes sapidus	24H	Mid-Freq	91.3077
508	Callinectes sapidus	72H	Mid-Freq	15.1667
508	Callinectes sapidus	7D	Mid-Freq	144.75
509	Callinectes sapidus	0H	Merchant Vessel	29.4286
510	Callinectes sapidus	0H	Merchant Vessel	55.8571
510	Callinectes sapidus	24H	Merchant Vessel	40.9231
510	Callinectes sapidus	72H	Merchant Vessel	96
510	Callinectes sapidus	7D	Merchant Vessel	134
512	Callinectes sapidus	0H	Merchant Vessel	200.143
512	Callinectes sapidus	0H	Merchant Vessel	116.833
513	Callinectes sapidus	0H	Mid-Freq	64.4286
513	Callinectes sapidus	24H	Mid-Freq	112.077
513	Callinectes sapidus	72H	Mid-Freq	81
514	Callinectes sapidus	0H	Control	216.167
515	Callinectes sapidus	0H	Merchant Vessel	74.0714
515	Callinectes sapidus	24H	Merchant Vessel	134.909
515	Callinectes sapidus	72H	Merchant Vessel	74.8182
516	Callinectes sapidus	0H	Control	158.714
516	Callinectes sapidus	24H	Control	80.5385
516	Callinectes sapidus	72H	Control	36.4848
516	Callinectes sapidus	7D	Control	50.1429
517	Callinectes sapidus	0H	Mid-Freq	73.3571
517	Callinectes sapidus	24H	Mid-Freq	167.833
517	Callinectes sapidus	72H	Mid-Freq	37.6667
517	Callinectes sapidus	7D	Mid-Freq	531
518	Callinectes sapidus	0H	Merchant Vessel	204.786
518	Callinectes sapidus	24H	Merchant Vessel	29.7692
518	Callinectes sapidus	72H	Merchant Vessel	64.9697
518	Callinectes sapidus	7D	Merchant Vessel	99
519	Callinectes sapidus	0H	Control	120.5
519	Callinectes sapidus	24H	Control	66.3077
519	Callinectes sapidus	72H	Control	162.848
519	Callinectes sapidus	7D	Control	129.786
521	Callinectes sapidus	0H	Control	173.714
521	Callinectes sapidus	24H	Control	44.7692
521	Callinectes sapidus	72H	Control	45.5758
521	Callinectes sapidus	7D	Control	61.7273
522	Callinectes sapidus	0H	Control	158.714
522	Callinectes sapidus	24H	Control	12.8462
522	Callinectes sapidus	72H	Control	34.5152
523	Callinectes sapidus	0H	Control	237
523	Callinectes sapidus	24H	Control	72.4615
523	Callinectes sapidus	72H	Control	30.7273
523	Callinectes sapidus	7D	Control	97.1818
524	Callinectes sapidus	0H	Control	73
524	Callinectes sapidus	24H	Control	140.923
524	Callinectes sapidus	72H	Control	36.1818
524	Callinectes sapidus	7D	Control	73.0909
531	Callinectes sapidus	0H	Control	109.786
531	Callinectes sapidus	24H	Control	42.0769
531	Callinectes sapidus	72H	Control	33.4545
532	Callinectes sapidus	0H	Control	88.2857
532	Callinectes sapidus	24H	Control	38.2308
533	Callinectes sapidus	0H	Control	73
533	Callinectes sapidus	24H	Control	106.308
533	Callinectes sapidus	72H	Control	48.1515
533	Callinectes sapidus	7D	Control	80.8182
534	Callinectes sapidus	0H	Mid-Freq	373
534	Callinectes sapidus	24H	Mid-Freq	59
534	Callinectes sapidus	72H	Mid-Freq	74.3333
534	Callinectes sapidus	7D	Mid-Freq	156.417
537	Callinectes sapidus	0H	Mid-Freq	66.2143
539	Callinectes sapidus	0H	Merchant Vessel	117.643
539	Callinectes sapidus	24H	Merchant Vessel	230.364
539	Callinectes sapidus	72H	Merchant Vessel	42.0909
539	Callinectes sapidus	7D	Merchant Vessel	121.273
541	Callinectes sapidus	0H	Merchant Vessel	70.4286
541	Callinectes sapidus	24H	Merchant Vessel	214.385
541	Callinectes sapidus	72H	Merchant Vessel	155.167
541	Callinectes sapidus	7D	Merchant Vessel	108.545
542	Callinectes sapidus	0H	Merchant Vessel	234.75
542	Callinectes sapidus	24H	Merchant Vessel	89.3846
542	Callinectes sapidus	72H	Merchant Vessel	43.9167
542	Callinectes sapidus	7D	Merchant Vessel	97.1818
544	Callinectes sapidus	0H	Control	91.9286
544	Callinectes sapidus	24H	Control	86.3077
544	Callinectes sapidus	72H	Control	49.6667
544	Callinectes sapidus	7D	Control	105.364
545	Callinectes sapidus	0H	Control	282.286
545	Callinectes sapidus	24H	Control	64.7857
545	Callinectes sapidus	72H	Control	23.6061
545	Callinectes sapidus	7D	Control	41.2727
546	Callinectes sapidus	0H	Mid-Freq	140.5
546	Callinectes sapidus	24H	Mid-Freq	84.5
546	Callinectes sapidus	72H	Mid-Freq	84.75
546	Callinectes sapidus	7D	Mid-Freq	201
547	Callinectes sapidus	0H	Mid-Freq	121.929
547	Callinectes sapidus	24H	Merchant Vessel	32.4615
547	Callinectes sapidus	72H	Merchant Vessel	117.667
547	Callinectes sapidus	7D	Merchant Vessel	96.7273
548	Callinectes sapidus	0H	Mid-Freq	67.5714
548	Callinectes sapidus	24H	Mid-Freq	81.6923
548	Callinectes sapidus	72H	Mid-Freq	146.417
549	Callinectes sapidus	0H	Mid-Freq	76.5714
549	Callinectes sapidus	24H	Mid-Freq	62.0769
549	Callinectes sapidus	72H	Mid-Freq	51
549	Callinectes sapidus	7D	Mid-Freq	271.273
550	Callinectes sapidus	24H	Control	71.9286
550	Callinectes sapidus	72H	Control	87.2424
550	Callinectes sapidus	7D	Control	87.1818
551	Callinectes sapidus	0H	Merchant Vessel	99.3333
551	Callinectes sapidus	0H	Control	76.9286
551	Callinectes sapidus	24H	Merchant Vessel	75.9231
551	Callinectes sapidus	72H	Merchant Vessel	48.0833
552	Callinectes sapidus	0H	Control	294.786
552	Callinectes sapidus	24H	Control	108.357
552	Callinectes sapidus	72H	Control	99.3636
552	Callinectes sapidus	7D	Control	62.1818
557	Callinectes sapidus	0H	Mid-Freq	299.429
557	Callinectes sapidus	24H	Merchant Vessel	235.364
557	Callinectes sapidus	72H	Merchant Vessel	94.9697
557	Callinectes sapidus	7D	Merchant Vessel	197.636

## Sheet: Callinectes sound glucose
Initial Order	Sample Name	Animal #	Species	Time	Treatment	Abs1	Abs2	Avg abs	Avg abs Blanked	Actual Glucose amount (uM)
124	0H CON 01	501	Callinectes sapidus	0H	Control	0.26	0.178	0.219	0.189	134.071
109	24H CON 01	501	Callinectes sapidus	24H	Control	0.054	0.049	0.0515	0.018	11.6923
147	0H HI 02	502	Callinectes sapidus	0H	Mid-Freq	0.349	0.324	0.3365	0.3065	218
92	24H HI 02	502	Callinectes sapidus	24H	Mid-Freq	0.146	0.141	0.1435	0.11	82.4615
34	72H HI 02	502	Callinectes sapidus	72H	Mid-Freq		0.106	0.053	0.021	16.4167
182	7D HI 02	502	Callinectes sapidus	7D	Mid-Freq	0.322		0.322	0.29	255.818
268	0H HI 03	503	Callinectes sapidus	0H	Mid-Freq	0.132	0.157	0.1445	0.1135	80.7857
93	24H HI 03	503	Callinectes sapidus	24H	Mid-Freq	0.091	0.12	0.1055	0.072	53.2308
31	72H HI 03	503	Callinectes sapidus	72H	Mid-Freq	0.139	0.143	0.141	0.109	89.75
286	7D HI 03	503	Callinectes sapidus	7D	Mid-Freq	0.462	0.444	0.453	0.4195	350.583
148	0H HI 04	504	Callinectes sapidus	0H	Mid-Freq	0.378	0.222	0.3	0.27	191.929
94	24H HI 04	504	Callinectes sapidus	24H	Mid-Freq	0.154	0.185	0.1695	0.136	102.462
27	72H HI 04	504	Callinectes sapidus	72H	Mid-Freq	0.088	0.099	0.0935	0.0615	50.1667
287	7D HI 04	504	Callinectes sapidus	7D	Mid-Freq	0.098	0.095	0.0965	0.063	53.5
269	0H HI 05	505	Callinectes sapidus	0H	Mid-Freq	0.147	0.097	0.122	0.091	64.7143
95	24H HI 05	505	Callinectes sapidus	24H	Mid-Freq	0.13	0.123	0.1265	0.093	69.3846
30	72H HI 05	505	Callinectes sapidus	72H	Mid-Freq	0.101	0.097	0.099	0.067	54.75
288	7D HI 05	505	Callinectes sapidus	7D	Mid-Freq	0.206	0.083	0.1445	0.111	93.5
125	0H CON 06 HCM	506	Callinectes sapidus	0H	Control	0.108	0.136	0.122	0.092	64.7857
110	24H CON 06	506	Callinectes sapidus	24H	Control	0.101	0.097	0.099	0.0655	48.2308
137	0H BN 7	507	Callinectes sapidus	0H	Merchant Vessel	0.329	0.332	0.3305	0.3005	213.714
196	24H BN 07	507	Callinectes sapidus	24H	Merchant Vessel	0.339	0.421	0.38	0.348	308.545
41	72H BN 07	507	Callinectes sapidus	72H	Merchant Vessel	0.217	0.19	0.2035	0.14	42.0909
169	7D BN 07	507	Callinectes sapidus	7D	Merchant Vessel	0.177	0.148	0.1625	0.1305	110.818
270	0H HI 08	508	Callinectes sapidus	0H	Mid-Freq	0.236	0.181	0.2085	0.1775	126.5
96	24H HI 08	508	Callinectes sapidus	24H	Mid-Freq	0.152	0.158	0.155	0.1215	91.3077
29	72H HI 08	508	Callinectes sapidus	72H	Mid-Freq	0.054	0.049	0.0515	0.0195	15.1667
289	7D HI 08	508	Callinectes sapidus	7D	Mid-Freq	0.222	0.19	0.206	0.1725	144.75
138	0H BN 9	509	Callinectes sapidus	0H	Merchant Vessel	0.057	0.088	0.0725	0.0425	29.4286
139	0H BN 10	510	Callinectes sapidus	0H	Merchant Vessel	0.109	0.11	0.1095	0.0795	55.8571
101	24H BN 10	510	Callinectes sapidus	24H	Merchant Vessel	0.075	0.104	0.0895	0.056	40.9231
40	72H BN 10	510	Callinectes sapidus	72H	Merchant Vessel	0.138	0.159	0.1485	0.1165	96
170	7D BN 10	510	Callinectes sapidus	7D	Merchant Vessel	0.19	0.186	0.188	0.156	134
140	0H BN 12	512	Callinectes sapidus	0H	Merchant Vessel	0.346	0.277	0.3115	0.2815	200.143
282	24H BN 12	512	Callinectes sapidus	0H	Merchant Vessel	0.117	0.228	0.1725	0.139	116.833
149	0H HI 13	513	Callinectes sapidus	0H	Mid-Freq	0.123	0.12	0.1215	0.0915	64.4286
97	24H HI 13	513	Callinectes sapidus	24H	Mid-Freq	0.069	0.295	0.182	0.1485	112.077
35	72H HI 13	513	Callinectes sapidus	72H	Mid-Freq	0.126	0.135	0.1305	0.0985	81
239	0H CON 14	514	Callinectes sapidus	0H	Control	0.342	0.241	0.2915	0.26	216.167
141	0H BN 15	515	Callinectes sapidus	0H	Merchant Vessel	0.131	0.139	0.135	0.105	74.0714
197	24H BN 15	515	Callinectes sapidus	24H	Merchant Vessel	0.121	0.257	0.189	0.157	134.909
42	72H BN 15	515	Callinectes sapidus	72H	Merchant Vessel	0.302	0.321	0.3115	0.248	74.8182
126	0H CON 16	516	Callinectes sapidus	0H	Control	0.38	0.127	0.2535	0.2235	158.714
111	24H CON 16	516	Callinectes sapidus	24H	Control	0.139	0.143	0.141	0.1075	80.5385
56	72H CON 16	516	Callinectes sapidus	72H	Control	0.177	0.193	0.185	0.1215	36.4848
159	7D CON 16	516	Callinectes sapidus	7D	Control	0.097	0.106	0.1015	0.0715	50.1429
150	0H HI 17	517	Callinectes sapidus	0H	Mid-Freq	0.116	0.152	0.134	0.104	73.3571
225	24H HI 17	517	Callinectes sapidus	24H	Mid-Freq	0.226	0.241	0.2335	0.202	167.833
25	72H HI 17	517	Callinectes sapidus	72H	Mid-Freq	0.066	0.091	0.0785	0.0465	37.6667
290	7D HI 17	517	Callinectes sapidus	7D	Mid-Freq	0.664	0.675	0.6695	0.636	531
142	0H BN 18	518	Callinectes sapidus	0H	Merchant Vessel	0.355	0.281	0.318	0.288	204.786
102	24H BN 18	518	Callinectes sapidus	24H	Merchant Vessel	0.075		0.075	0.0415	29.7692
43	72H BN 18	518	Callinectes sapidus	72H	Merchant Vessel	0.268	0.29	0.279	0.2155	64.9697
171	7D BN 18	518	Callinectes sapidus	7D	Merchant Vessel	0.148	0.151	0.1495	0.1175	99
127	0H CON 19	519	Callinectes sapidus	0H	Control	0.175	0.225	0.2	0.17	120.5
112	24H CON 19	519	Callinectes sapidus	24H	Control	0.126	0.119	0.1225	0.089	66.3077
57	72H CON 19	519	Callinectes sapidus	72H	Control	0.547	0.657	0.602	0.5385	162.848
160	7D CON 19	519	Callinectes sapidus	7D	Control	0.216	0.21	0.213	0.183	129.786
128	0H CON 21	521	Callinectes sapidus	0H	Control	0.263	0.286	0.2745	0.2445	173.714
113	24H CON 21	521	Callinectes sapidus	24H	Control	0.086	0.103	0.0945	0.061	44.7692
58	72H CON 21	521	Callinectes sapidus	72H	Control	0.268	0.162	0.215	0.1515	45.5758
161	7D CON 21	521	Callinectes sapidus	7D	Control	0.105	0.112	0.1085	0.0765	61.7273
129	0H CON 22	522	Callinectes sapidus	0H	Control	0.158	0.349	0.2535	0.2235	158.714
114	24H CON 22	522	Callinectes sapidus	24H	Control		0.106	0.053	0.0195	12.8462
59	72H CON 22	522	Callinectes sapidus	72H	Control	0.16	0.197	0.1785	0.115	34.5152
240	0H CON 23	523	Callinectes sapidus	0H	Control	0.311	0.322	0.3165	0.285	237
115	24H CON 23	523	Callinectes sapidus	24H	Control	0.126	0.135	0.1305	0.097	72.4615
60	72H CON 23	523	Callinectes sapidus	72H	Control	0.173	0.159	0.166	0.1025	30.7273
162	7DCON 23	523	Callinectes sapidus	7D	Control	0.119	0.176	0.1475	0.1155	97.1818
130	0H CON 24	524	Callinectes sapidus	0H	Control	0.132	0.135	0.1335	0.1035	73
116	24H CON 24	524	Callinectes sapidus	24H	Control	0.301	0.138	0.2195	0.186	140.923
61	72H CON 24	524	Callinectes sapidus	72H	Control	0.182	0.186	0.184	0.1205	36.1818
163	7D CON 24	524	Callinectes sapidus	7D	Control		0.121	0.121	0.089	73.0909
131	0H CON 31	531	Callinectes sapidus	0H	Control	0.171	0.199	0.185	0.155	109.786
117	24H CON 31	531	Callinectes sapidus	24H	Control	0.093	0.089	0.091	0.0575	42.0769
62	72H CON 31	531	Callinectes sapidus	72H	Control	0.187	0.163	0.175	0.1115	33.4545
241	0H CON 32	532	Callinectes sapidus	0H	Control	0.166	0.144	0.155	0.124	88.2857
118	24H CON 32	532	Callinectes sapidus	24H	Control	0.09	0.082	0.086	0.0525	38.2308
132	0H CON 33	533	Callinectes sapidus	0H	Control	0.127	0.14	0.1335	0.1035	73
119	24H CON 33	533	Callinectes sapidus	24H	Control	0.178	0.171	0.1745	0.141	106.308
63	72H CON 33	533	Callinectes sapidus	72H	Control	0.229	0.218	0.2235	0.16	48.1515
164	7D CON 33	533	Callinectes sapidus	7D	Control	0.119	0.14	0.1295	0.0975	80.8182
151	0H HI 34	534	Callinectes sapidus	0H	Mid-Freq	0.562	0.545	0.5535	0.5235	373
98	24H HI 34	534	Callinectes sapidus	24H	Mid-Freq	0.113	0.113	0.113	0.0795	59
32	72H HI 34	534	Callinectes sapidus	72H	Mid-Freq	0.126	0.119	0.1225	0.0905	74.3333
291	7D HI 34	534	Callinectes sapidus	7D	Mid-Freq	0.243	0.197	0.22	0.1865	156.417
152	0H HI 37	537	Callinectes sapidus	0H	Mid-Freq	0.129	0.119	0.124	0.094	66.2143
143	0H BN 39	539	Callinectes sapidus	0H	Merchant Vessel	0.212	0.18	0.196	0.166	117.643
198	24H BN 39	539	Callinectes sapidus	24H	Merchant Vessel	0.294		0.294	0.262	230.364
44	72H BN 39	539	Callinectes sapidus	72H	Merchant Vessel	0.211	0.196	0.2035	0.14	42.0909
172	7D BN 39	539	Callinectes sapidus	7D	Merchant Vessel		0.174	0.174	0.142	121.273
256	0H BN 41	541	Callinectes sapidus	0H	Merchant Vessel	0.144	0.116	0.13	0.099	70.4286
103	24H BN 41	541	Callinectes sapidus	24H	Merchant Vessel	0.288	0.342	0.315	0.2815	214.385
36	72H BN 41	541	Callinectes sapidus	72H	Merchant Vessel	0.301	0.138	0.2195	0.1875	155.167
173	7D BN 41	541	Callinectes sapidus	7D	Merchant Vessel	0.157	0.163	0.16	0.128	108.545
23	0H BN 42	542	Callinectes sapidus	0H	Merchant Vessel	0.288	0.342	0.315	0.283	234.75
104	24H BN 42	542	Callinectes sapidus	24H	Merchant Vessel	0.151	0.154	0.1525	0.119	89.3846
38	72H BN 42	542	Callinectes sapidus	72H	Merchant Vessel	0.09	0.082	0.086	0.054	43.9167
174	7D BN 42	542	Callinectes sapidus	7D	Merchant Vessel	0.145	0.15	0.1475	0.1155	97.1818
133	0H CON 44	544	Callinectes sapidus	0H	Control	0.148	0.172	0.16	0.13	91.9286
120	24H CON 44	544	Callinectes sapidus	24H	Control	0.138	0.159	0.1485	0.115	86.3077
64	72H CON 44	544	Callinectes sapidus	72H	Control	0.218	0.239	0.2285	0.165	49.6667
165	7D CON 44	544	Callinectes sapidus	7D	Control	0.155	0.158	0.1565	0.1245	105.364
134	0H CON 45	545	Callinectes sapidus	0H	Control	0.427	0.426	0.4265	0.3965	282.286
121	24H CON 45	545	Callinectes sapidus	24H	Control	0.112	0.132	0.122	0.092	64.7857
65	72H CON 45	545	Callinectes sapidus	72H	Control	0.139	0.146	0.1425	0.079	23.6061
166	7D CON 45	545	Callinectes sapidus	7D	Control	0.088	0.084	0.086	0.054	41.2727
144	0H HI 46	546	Callinectes sapidus	0H	Mid-Freq	0.354	0.102	0.228	0.198	140.5
226	24H HI 46	546	Callinectes sapidus	24H	Mid-Freq	0.118	0.149	0.1335	0.102	84.5
26	72H HI 46	546	Callinectes sapidus	72H	Mid-Freq	0.135	0.135	0.135	0.103	84.75
292	7D HI 46	546	Callinectes sapidus	7D	Mid-Freq	0.403	0.144	0.2735	0.24	201
145	0H HI 47	547	Callinectes sapidus	0H	Mid-Freq	0.204	0.2	0.202	0.172	121.929
105	24H BN 47	547	Callinectes sapidus	24H	Merchant Vessel	0.066	0.091	0.0785	0.045	32.4615
39	72H BN 47	547	Callinectes sapidus	72H	Merchant Vessel	0.178	0.171	0.1745	0.1425	117.667
175	7D BN 47	547	Callinectes sapidus	7D	Merchant Vessel	0.144	0.15	0.147	0.115	96.7273
271	0H HI 48	548	Callinectes sapidus	0H	Mid-Freq	0.121	0.131	0.126	0.095	67.5714
99	24H HI 48	548	Callinectes sapidus	24H	Mid-Freq	0.152	0.133	0.1425	0.109	81.6923
28	72H HI 48	548	Callinectes sapidus	72H	Mid-Freq	0.26	0.158	0.209	0.177	146.417
153	0H HI 49	549	Callinectes sapidus	0H	Mid-Freq	0.143	0.134	0.1385	0.1085	76.5714
100	24H HI 49	549	Callinectes sapidus	24H	Mid-Freq	0.112	0.122	0.117	0.0835	62.0769
33	72H HI 49	549	Callinectes sapidus	72H	Mid-Freq	0.086	0.103	0.0945	0.0625	51
183	7D HI 49	549	Callinectes sapidus	7D	Mid-Freq	0.439	0.239	0.339	0.307	271.273
122	24H CON 50	550	Callinectes sapidus	24H	Control	0.143	0.121	0.132	0.102	71.9286
66	72H CON 50	550	Callinectes sapidus	72H	Control	0.429	0.276	0.3525	0.289	87.2424
167	7D CON 50	550	Callinectes sapidus	7D	Control	0.139	0.134	0.1365	0.1045	87.1818
24	0H BN 51	551	Callinectes sapidus	0H	Merchant Vessel	0.151	0.154	0.1525	0.1205	99.3333
135	0H CON 51	551	Callinectes sapidus	0H	Control	0.14	0.138	0.139	0.109	76.9286
106	24H BN 51	551	Callinectes sapidus	24H	Merchant Vessel	0.135	0.135	0.135	0.1015	75.9231
37	72H BN 51	551	Callinectes sapidus	72H	Merchant Vessel	0.093	0.089	0.091	0.059	48.0833
136	0H CON 52	552	Callinectes sapidus	0H	Control	0.461	0.427	0.444	0.414	294.786
123	24H CON 52	552	Callinectes sapidus	24H	Control	0.195	0.171	0.183	0.153	108.357
67	72H CON 52	552	Callinectes sapidus	72H	Control	0.403	0.382	0.3925	0.329	99.3636
168	7D CON 52	552	Callinectes sapidus	7D	Control	0.109		0.109	0.077	62.1818
146	0H HI 57	557	Callinectes sapidus	0H	Mid-Freq	0.447	0.454	0.4505	0.4205	299.429
199	24H BN 57	557	Callinectes sapidus	24H	Merchant Vessel	0.227	0.372	0.2995	0.2675	235.364
45	72H BN 57	557	Callinectes sapidus	72H	Merchant Vessel	0.382	0.374	0.378	0.3145	94.9697
176	7D BN 57	557	Callinectes sapidus	7D	Merchant Vessel	0.267	0.249	0.258	0.226	197.636
