# Supplementary material for: Potential impacts from simulated vessel noise and sonar on commercially important invertebrates
Source: PeerJ. 2022 Jan 26;10:e12841. doi: 10.7717/peerj.12841 (PMC8800386; doi:10.7717/peerj.12841)
Supplement: Supplemental Information 3 — Each data point refers to the amount of HSP27 per volume of total protein in the hemolymph of individual lobsters and crabs, by hour after exposure, by exposure, and by species. [file peerj-10-12841-s003.xlsx]

## Sheet: Treatments HSP ANOVA
Species	Animal ID number	Treatment	Hours after Treatment	HSP 27/protein (ng/uL)
Callinectes sapidus	501	Control	0	0
Callinectes sapidus	501	Control	24	0.000430341
Callinectes sapidus	502	MidFreq	0	4.27719e-05
Callinectes sapidus	502	MidFreq	24	6.79322e-05
Callinectes sapidus	502	MidFreq	48	9.01195e-05
Callinectes sapidus	502	MidFreq	168	1.52948e-05
Callinectes sapidus	503	MidFreq	0	0.000231072
Callinectes sapidus	503	MidFreq	24	0.000148231
Callinectes sapidus	503	MidFreq	48	3.34252e-05
Callinectes sapidus	503	MidFreq	168	0.000559602
Callinectes sapidus	504	MidFreq	0	7.89428e-07
Callinectes sapidus	504	MidFreq	24	4.58768e-05
Callinectes sapidus	504	MidFreq	48	3.22068e-05
Callinectes sapidus	504	MidFreq	168	1.35334e-05
Callinectes sapidus	505	MidFreq	0	0
Callinectes sapidus	505	MidFreq	24	4.62567e-06
Callinectes sapidus	505	MidFreq	48	7.35112e-05
Callinectes sapidus	505	MidFreq	168	8.13938e-05
Callinectes sapidus	506	Control	0	8.84721e-05
Callinectes sapidus	506	Control	24	0.00791998
Callinectes sapidus	507	MerchVessel	0	7.11261e-05
Callinectes sapidus	507	MerchVessel	24	4.53606e-05
Callinectes sapidus	507	MerchVessel	48	0.00156559
Callinectes sapidus	507	MerchVessel	168	0
Callinectes sapidus	508	MidFreq	0	0.000105957
Callinectes sapidus	508	MidFreq	24	9.73748e-06
Callinectes sapidus	508	MidFreq	48	4.8985e-05
Callinectes sapidus	508	MidFreq	168	2.65978e-05
Callinectes sapidus	509	MerchVessel	0	0.00359621
Callinectes sapidus	510	MerchVessel	0	0.000382312
Callinectes sapidus	510	MerchVessel	24	0
Callinectes sapidus	510	MerchVessel	48	9.79384e-05
Callinectes sapidus	510	MerchVessel	168	7.61354e-05
Callinectes sapidus	512	MerchVessel	0	0.00125986
Callinectes sapidus	513	MidFreq	0	0.000172312
Callinectes sapidus	513	MidFreq	24	0.000260206
Callinectes sapidus	513	MidFreq	72	3.86651e-05
Callinectes sapidus	514	Control	0	0.00237357
Callinectes sapidus	515	MerchVessel	0	3.26492e-05
Callinectes sapidus	515	MerchVessel	24	0
Callinectes sapidus	515	MerchVessel	72	5.56447e-05
Callinectes sapidus	516	Control	0	0.00010109
Callinectes sapidus	516	Control	24	1.67201e-05
Callinectes sapidus	516	Control	72	3.25848e-05
Callinectes sapidus	516	Control	168	9.56954e-06
Callinectes sapidus	517	MidFreq	0	0
Callinectes sapidus	517	MidFreq	24	0.000140292
Callinectes sapidus	517	MidFreq	72	8.15438e-05
Callinectes sapidus	517	MidFreq	168	0.000458098
Callinectes sapidus	518	MerchVessel	0	5.56001e-05
Callinectes sapidus	518	MerchVessel	24	0
Callinectes sapidus	518	MerchVessel	72	0
Callinectes sapidus	518	MerchVessel	168	2.41639e-05
Callinectes sapidus	519	Control	0	6.11936e-05
Callinectes sapidus	519	Control	24	0.00388201
Callinectes sapidus	519	Control	72	2.74786e-05
Callinectes sapidus	519	Control	168	0.00048724
Callinectes sapidus	521	Control	0	5.43033e-06
Callinectes sapidus	521	Control	24	0.00193929
Callinectes sapidus	521	Control	72	0
Callinectes sapidus	521	Control	168	0
Callinectes sapidus	522	Control	0	5.63664e-05
Callinectes sapidus	522	Control	24	7.37465e-05
Callinectes sapidus	522	Control	72	0
Callinectes sapidus	523	Control	0	0.000639295
Callinectes sapidus	523	Control	24	4.20689e-05
Callinectes sapidus	523	Control	72	0
Callinectes sapidus	523	Control	168	4.17394e-05
Callinectes sapidus	524	Control	0	0
Callinectes sapidus	524	Control	24	8.83483e-05
Callinectes sapidus	524	Control	72	3.95772e-05
Callinectes sapidus	524	Control	168	1.5176e-05
Callinectes sapidus	531	Control	0	0.000532889
Callinectes sapidus	531	Control	24	0.000300504
Callinectes sapidus	531	Control	72	0.000864771
Callinectes sapidus	532	Control	0	8.90027e-05
Callinectes sapidus	532	Control	24	0.00101037
Callinectes sapidus	533	Control	0	2.09237e-05
Callinectes sapidus	533	Control	24	1.60479e-05
Callinectes sapidus	533	Control	72	8.18537e-06
Callinectes sapidus	533	Control	168	0
Callinectes sapidus	534	MidFreq	0	0.000620979
Callinectes sapidus	534	MidFreq	24	0.000685836
Callinectes sapidus	534	MidFreq	72	6.30752e-05
Callinectes sapidus	534	MidFreq	168	0.000933401
Callinectes sapidus	537	MidFreq	0	0.00100847
Callinectes sapidus	539	MerchVessel	0	5.00249e-05
Callinectes sapidus	539	MerchVessel	24	6.98751e-05
Callinectes sapidus	539	MerchVessel	72	0.000542831
Callinectes sapidus	539	MerchVessel	168	0
Callinectes sapidus	541	MerchVessel	0	6.13526e-05
Callinectes sapidus	541	MerchVessel	24	2.40602e-05
Callinectes sapidus	541	MerchVessel	72	5.20309e-05
Callinectes sapidus	541	MerchVessel	168	0
Callinectes sapidus	542	MerchVessel	0	5.08068e-05
Callinectes sapidus	542	MerchVessel	24	5.13573e-05
Callinectes sapidus	542	MerchVessel	72	0.000128091
Callinectes sapidus	542	MerchVessel	168	0
Callinectes sapidus	544	Control	0	3.40372e-06
Callinectes sapidus	544	Control	24	0
Callinectes sapidus	544	Control	72	5.24759e-05
Callinectes sapidus	544	Control	168	0
Callinectes sapidus	545	Control	0	0.00044805
Callinectes sapidus	545	Control	24	2.37442e-05
Callinectes sapidus	545	Control	72	0.000165316
Callinectes sapidus	545	Control	168	4.42633e-05
Callinectes sapidus	546	MidFreq	0	1.45416e-06
Callinectes sapidus	546	MidFreq	24	1.11607e-05
Callinectes sapidus	546	MidFreq	72	4.98423e-05
Callinectes sapidus	546	MidFreq	168	2.56851e-06
Callinectes sapidus	547	MerchVessel	0	7.06926e-05
Callinectes sapidus	547	MerchVessel	24	0.00145079
Callinectes sapidus	547	MerchVessel	72	5.18006e-06
Callinectes sapidus	547	MerchVessel	168	0
Callinectes sapidus	548	MidFreq	0	3.1972e-05
Callinectes sapidus	548	MidFreq	24	0
Callinectes sapidus	548	MidFreq	72	6.05435e-05
Callinectes sapidus	549	MidFreq	0	4.89706e-06
Callinectes sapidus	549	MidFreq	24	5.81352e-06
Callinectes sapidus	549	MidFreq	72	1.86694e-05
Callinectes sapidus	549	MidFreq	168	1.05249e-06
Callinectes sapidus	550	Control	0	7.01784e-05
Callinectes sapidus	550	Control	24	1.69489e-05
Callinectes sapidus	550	Control	72	0
Callinectes sapidus	550	Control	168	0
Callinectes sapidus	551	MerchVessel	0	0.00026049
Callinectes sapidus	551	MerchVessel	24	2.97262e-05
Callinectes sapidus	551	MerchVessel	72	9.81472e-05
Callinectes sapidus	551	MerchVessel	168	0
Callinectes sapidus	552	Control	0	0
Callinectes sapidus	552	Control	24	0
Callinectes sapidus	552	Control	72	0
Callinectes sapidus	552	Control	168	0
Callinectes sapidus	557	MerchVessel	0	1.9906e-05
Callinectes sapidus	557	MerchVessel	24	4.64965e-05
Callinectes sapidus	557	MerchVessel	72	0
Callinectes sapidus	557	MerchVessel	168	1.06044e-05
Homarus americanus	559	MidFreq	0	0
Homarus americanus	559	MidFreq	24	0
Homarus americanus	559	MidFreq	72	0
Homarus americanus	559	MidFreq	168	0
Homarus americanus	560	Control	0	0
Homarus americanus	560	Control	24	0
Homarus americanus	560	Control	72	0
Homarus americanus	560	Control	168	0
Homarus americanus	561	Control	0	0
Homarus americanus	561	Control	24	2.18929e-05
Homarus americanus	561	Control	72	0
Homarus americanus	561	Control	168	0
Homarus americanus	563	Control	0	0
Homarus americanus	563	Control	24	0
Homarus americanus	563	Control	72	0
Homarus americanus	563	Control	168	0
Homarus americanus	564	MerchVessel	0	0
Homarus americanus	564	MerchVessel	24	6.12293e-06
Homarus americanus	564	MerchVessel	72	0
Homarus americanus	564	MerchVessel	168	0
Homarus americanus	565	MerchVessel	0	8.40814e-07
Homarus americanus	565	MerchVessel	24	0
Homarus americanus	565	MerchVessel	72	0
Homarus americanus	565	MerchVessel	168	0
Homarus americanus	567	Control	0	0
Homarus americanus	567	Control	24	0
Homarus americanus	567	Control	72	5.77676e-06
Homarus americanus	567	Control	168	-0.00224136
Homarus americanus	568	MidFreq	0	3.88682e-06
Homarus americanus	568	MidFreq	24	1.80431e-06
Homarus americanus	568	MidFreq	72	0
Homarus americanus	568	MidFreq	168	0
Homarus americanus	569	MerchVessel	0	0
Homarus americanus	569	MerchVessel	24	0
Homarus americanus	569	MerchVessel	72	1.58918e-05
Homarus americanus	569	MerchVessel	168	0
Homarus americanus	571	MidFreq	0	0
Homarus americanus	571	MidFreq	24	0
Homarus americanus	571	MidFreq	72	0
Homarus americanus	571	MidFreq	168	0
Homarus americanus	574	MerchVessel	0	0
Homarus americanus	574	MerchVessel	24	0
Homarus americanus	574	MerchVessel	72	0
Homarus americanus	574	MerchVessel	168	0
Homarus americanus	575	MerchVessel	0	0
Homarus americanus	575	MerchVessel	24	0
Homarus americanus	575	MerchVessel	72	0
Homarus americanus	575	MerchVessel	168	0
Homarus americanus	576	MidFreq	0	0
Homarus americanus	576	MidFreq	24	0
Homarus americanus	576	MidFreq	72	0
Homarus americanus	576	MidFreq	168	0
Homarus americanus	578	MidFreq	0	3.26153e-06
Homarus americanus	578	MidFreq	24	0
Homarus americanus	578	MidFreq	72	0
Homarus americanus	578	MidFreq	168	0
Homarus americanus	579	MidFreq	0	9.26946e-06
Homarus americanus	579	MidFreq	24	0
Homarus americanus	579	MidFreq	72	0
Homarus americanus	579	MidFreq	168	0
Homarus americanus	580	Control	0	3.4062e-05
Homarus americanus	580	Control	24	0
Homarus americanus	580	Control	72	0
Homarus americanus	580	Control	168	-6.06631e-05
Homarus americanus	581	MerchVessel	0	0
Homarus americanus	581	MerchVessel	24	0
Homarus americanus	581	MerchVessel	72	0
Homarus americanus	581	MerchVessel	168	0
Homarus americanus	582	MidFreq	0	1.04403e-05
Homarus americanus	582	MidFreq	24	0
Homarus americanus	582	MidFreq	72	3.40529e-06
Homarus americanus	582	MidFreq	168	0
Homarus americanus	583	MidFreq	0	1.41936e-05
Homarus americanus	583	MidFreq	24	0
Homarus americanus	583	MidFreq	72	0
Homarus americanus	583	MidFreq	168	0
Homarus americanus	584	MerchVessel	0	0
Homarus americanus	584	MerchVessel	24	1.13845e-05
Homarus americanus	584	MerchVessel	72	0
Homarus americanus	584	MerchVessel	168	8.57761e-06
Homarus americanus	585	Control	0	0
Homarus americanus	585	Control	24	0
Homarus americanus	585	Control	72	0
Homarus americanus	585	Control	168	0
Homarus americanus	586	Control	0	3.55602e-06
Homarus americanus	586	Control	24	0
Homarus americanus	586	Control	72	0
Homarus americanus	586	Control	168	0
Homarus americanus	587	Control	24	1.29411e-06
Homarus americanus	587	Control	72	0
Homarus americanus	587	Control	168	0
Homarus americanus	588	Control	0	0
Homarus americanus	588	Control	24	7.56689e-06
Homarus americanus	588	Control	72	0
Homarus americanus	588	Control	168	0
Homarus americanus	589	MerchVessel	0	-0.00679828
Homarus americanus	589	MerchVessel	24	0
Homarus americanus	589	MerchVessel	72	1.11387e-05
Homarus americanus	589	MerchVessel	168	0
Homarus americanus	590	MidFreq	0	2.50132e-05
Homarus americanus	590	MidFreq	24	0
Homarus americanus	590	MidFreq	72	0
Homarus americanus	590	MidFreq	168	0
Homarus americanus	592	MerchVessel	0	4.43525e-06
Homarus americanus	592	MerchVessel	24	0
Homarus americanus	592	MerchVessel	72	0
Homarus americanus	592	MerchVessel	168	0
Homarus americanus	593	MidFreq	0	0
Homarus americanus	593	MidFreq	24	7.573e-07
Homarus americanus	593	MidFreq	72	0
Homarus americanus	593	MidFreq	168	0
Homarus americanus	594	MidFreq	0	3.67241e-05
Homarus americanus	594	MidFreq	24	9.24398e-06
Homarus americanus	594	MidFreq	72	0
Homarus americanus	594	MidFreq	168	0
Homarus americanus	595	MerchVessel	0	0
Homarus americanus	595	MerchVessel	24	0
Homarus americanus	595	MerchVessel	72	0
Homarus americanus	595	MerchVessel	168	0
Homarus americanus	596	Control	0	0
Homarus americanus	596	Control	24	6.57504e-05
Homarus americanus	596	Control	72	0
Homarus americanus	596	Control	168	-0.000383565
Homarus americanus	597	Control	0	0
Homarus americanus	597	Control	24	2.38049e-06
Homarus americanus	597	Control	72	0
Homarus americanus	597	Control	168	0
Homarus americanus	598	MerchVessel	0	-0.00127843
Homarus americanus	598	MerchVessel	24	0
Homarus americanus	598	MerchVessel	72	1.22855e-05
Homarus americanus	598	MerchVessel	168	3.30172e-06
Homarus americanus	599	MerchVessel	0	0
Homarus americanus	599	MerchVessel	24	0
Homarus americanus	599	MerchVessel	72	0
Homarus americanus	599	MerchVessel	168	0
Homarus americanus	600	MidFreq	0	5.59473e-07
Homarus americanus	600	MidFreq	24	0
Homarus americanus	600	MidFreq	72	0
Homarus americanus	600	MidFreq	168	0
Homarus americanus	602	Control	0	1.25787e-05
Homarus americanus	602	Control	24	0
Homarus americanus	602	Control	72	-5.08365e-05
Homarus americanus	602	Control	168	0
Homarus americanus	603	Control	0	0
Homarus americanus	603	Control	24	0
Homarus americanus	603	Control	72	0
Homarus americanus	603	Control	168	1.18693e-05
Homarus americanus	604	Control	0	0
Homarus americanus	604	Control	24	3.86049e-06
Homarus americanus	604	Control	72	0.00136429
Homarus americanus	604	Control	168	0
Homarus americanus	605	Control	0	1.51393e-05
Homarus americanus	605	Control	24	0
Homarus americanus	605	Control	72	0
Homarus americanus	605	Control	168	0
