# Supplementary material for: Potential impacts from simulated vessel noise and sonar on commercially important invertebrates
Source: PeerJ journal article supplement (doi:10.7717/peerj.12841), 2022-01-26

**A*****C. sapidus***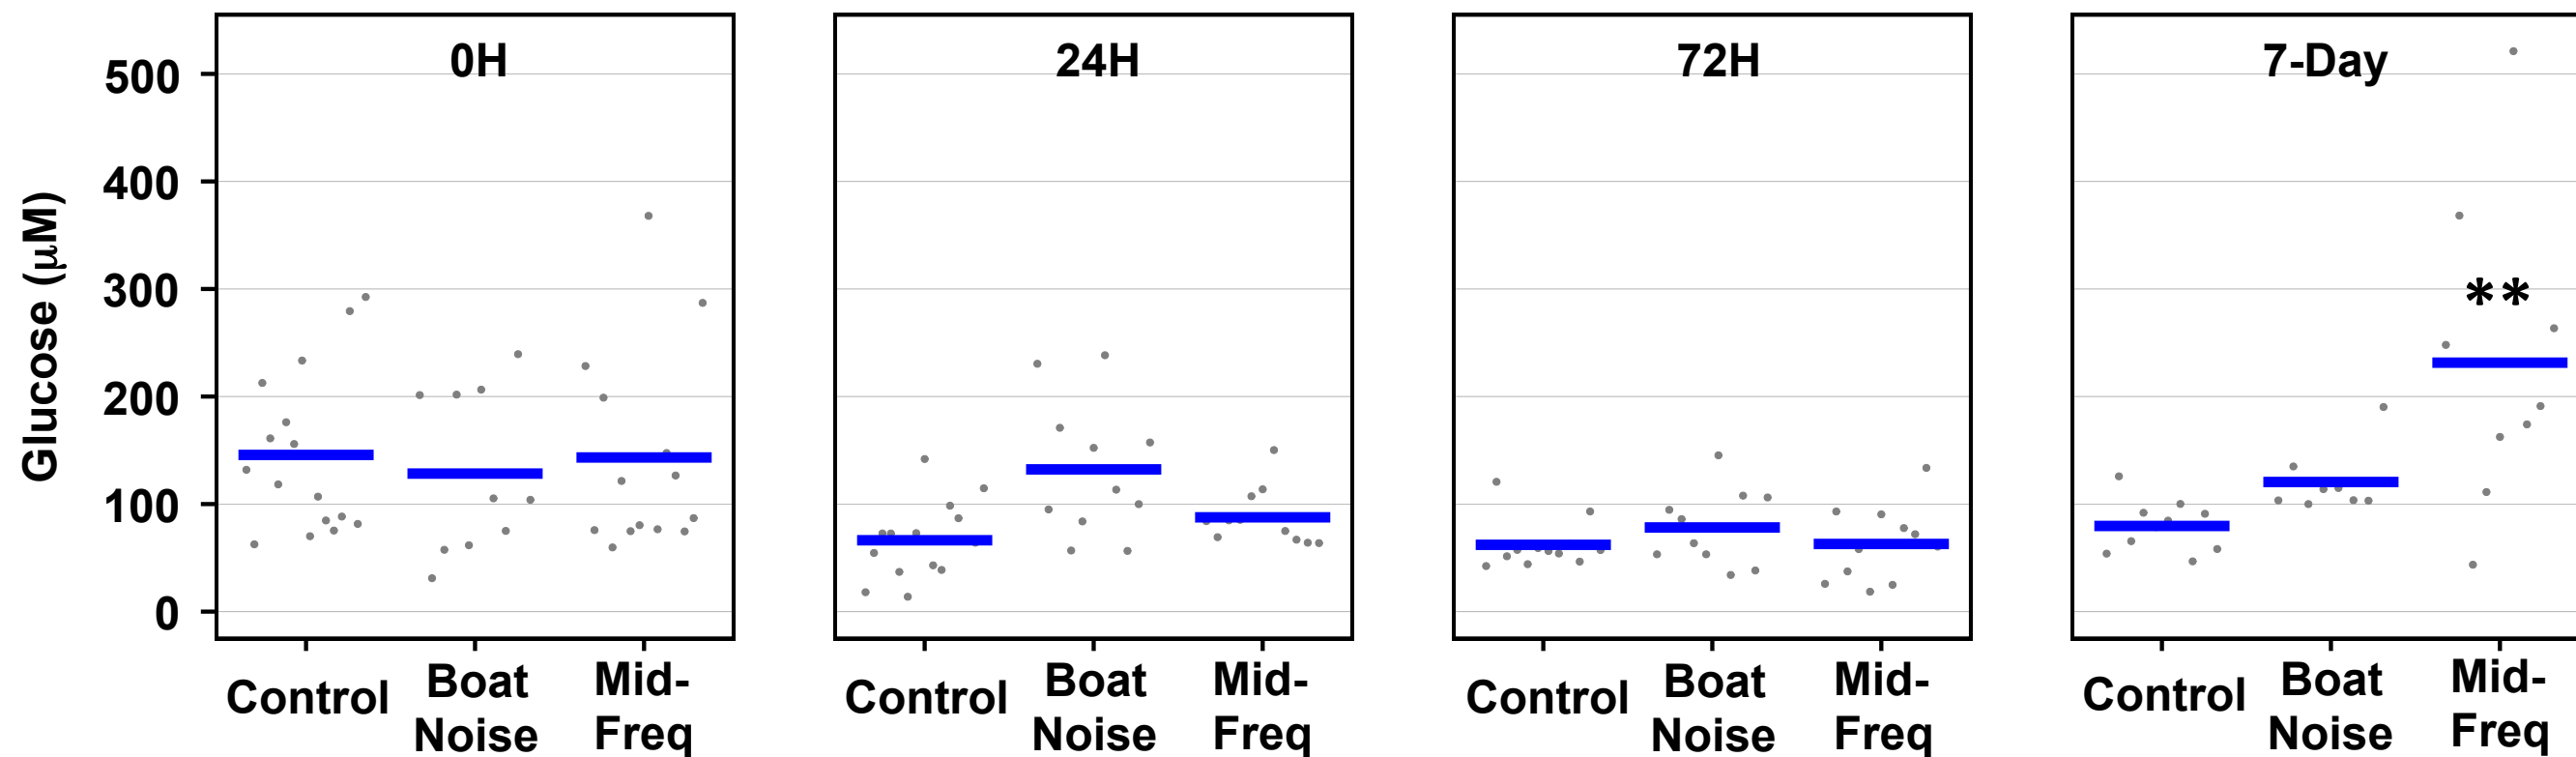**B*****H. americanus***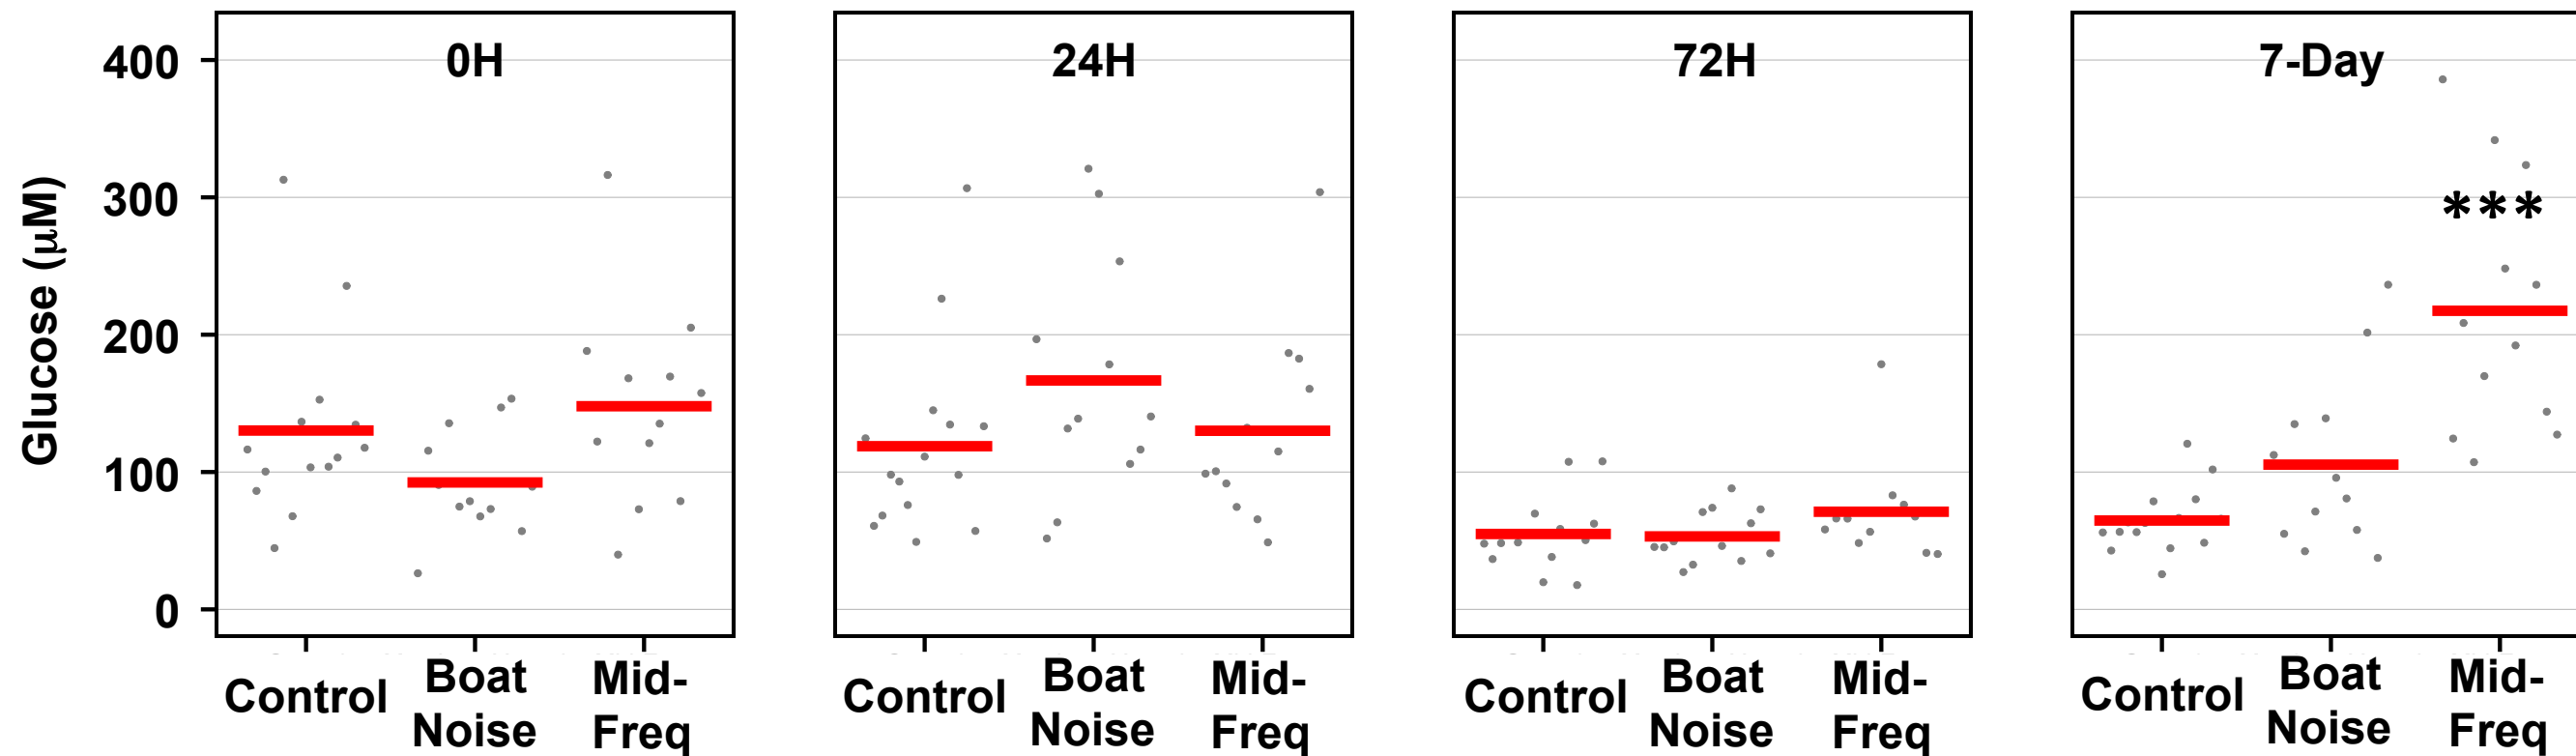

Supplement: Supplemental_Figure1_Glucose_Model_Outputs.pdf [file Supplemental_Figure1_Glucose_Model_Outputs.pdf]
